# Supplementary material for: Whole genome based insights into the phylogeny and evolution of the Juglandaceae
Source: PubMed Central journal article supplement (PMC8529855; doi:10.1186/s12862-021-01917-3), 2021-10-21

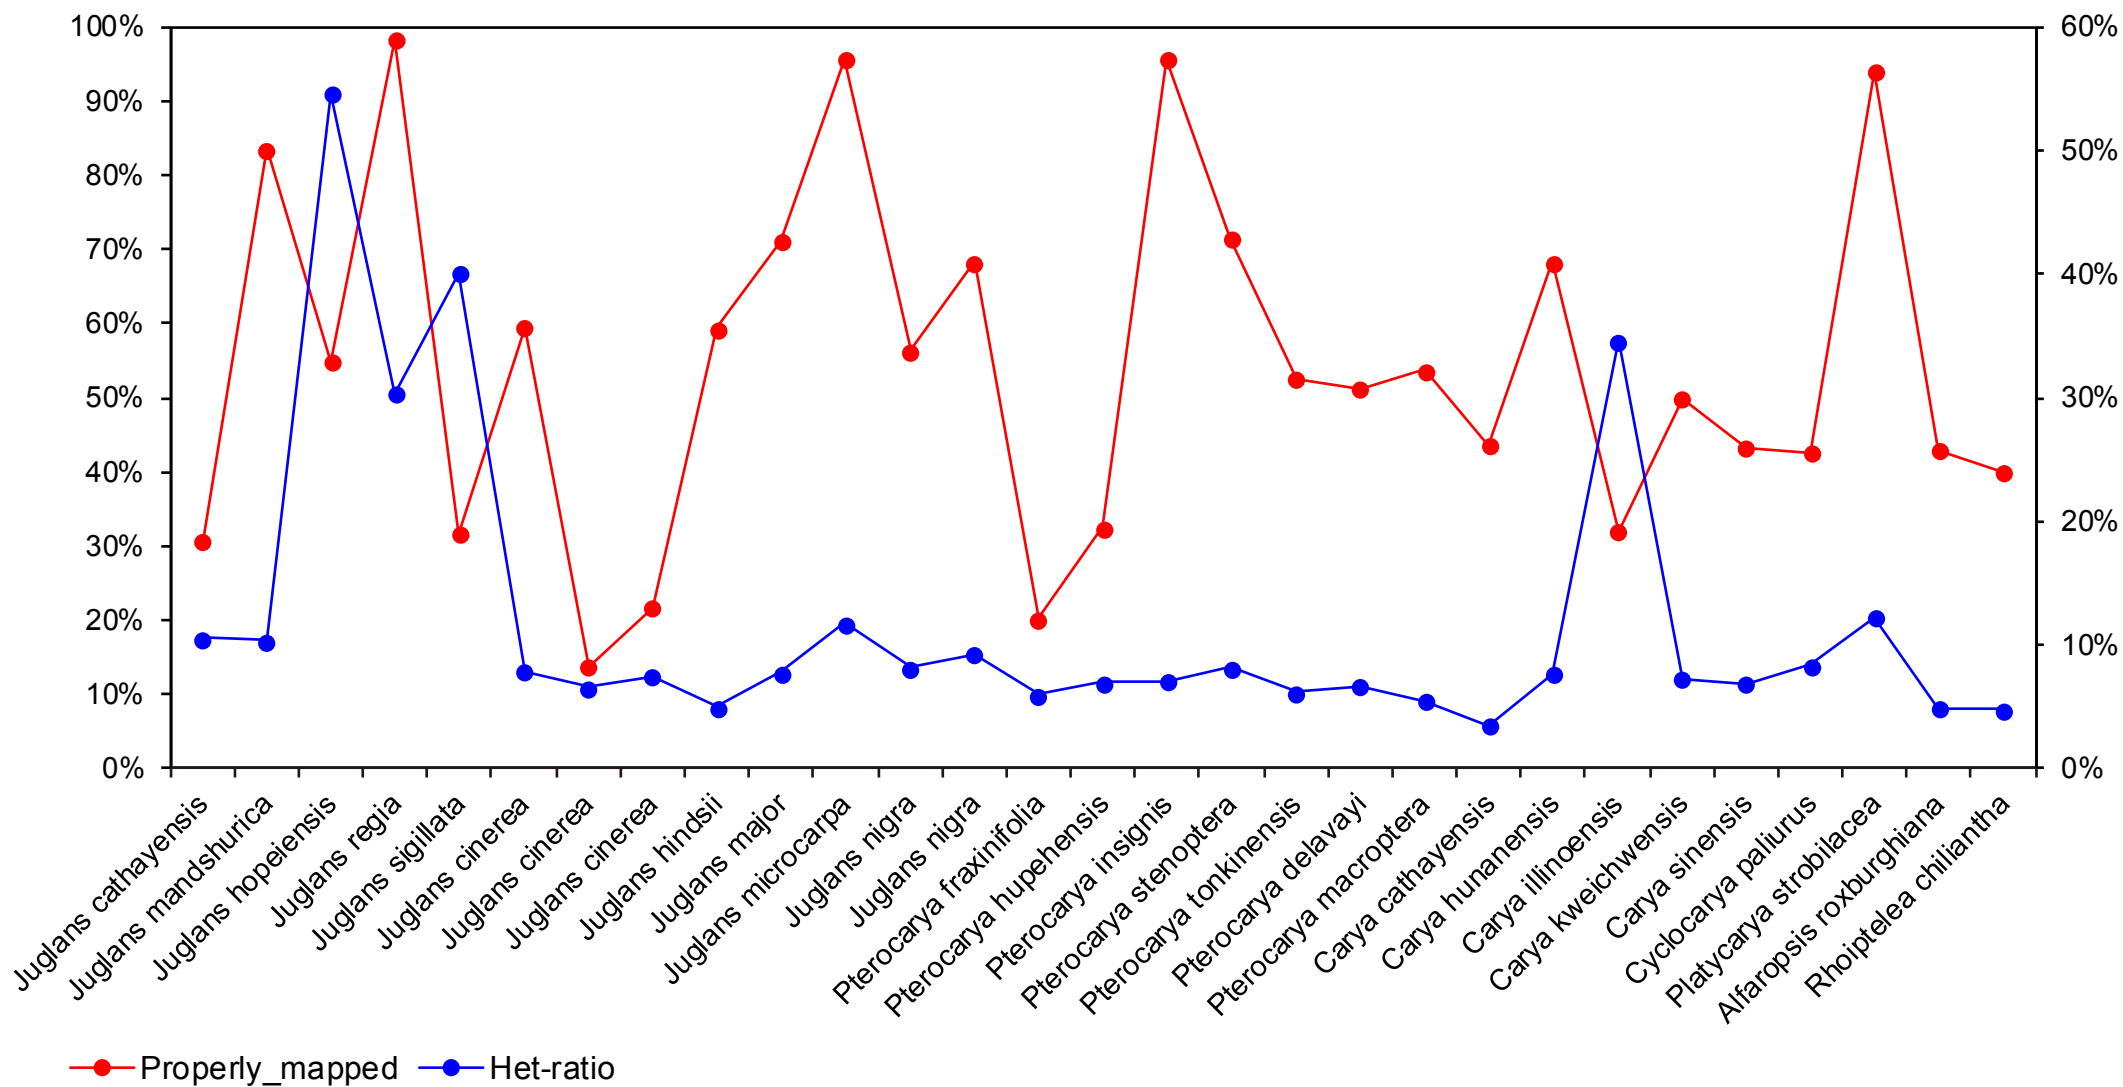

Supplement: 12862_2021_1917_MOESM3_ESM.pdf [file 12862_2021_1917_MOESM3_ESM.pdf]
